# Supplementary material for: A comparative metabolomics study of anthocyanins and taste components in Chinese bayberry (Morella rubra) with different flesh colors
Source: PeerJ. 2022 May 31;10:e13466. doi: 10.7717/peerj.13466 (PMC9165596; doi:10.7717/peerj.13466)
Supplement: Supplemental Information 2 [file peerj-10-13466-s002.xlsx]

## Sheet: Sheet1
	BDK-1	BDK-2	BDK-3	BDK-average	Standard deviation		DK-1	DK-2	DK-3	DK-average	Standard deviation
Anthocyanin content	78.6	68.1	98.1	81.6	15.2233		657.5	674.8	625	652.433	25.2837
（mg·kg-1FW）
